# Supplementary material for: Selecting a single powdered activated carbon against multiple threats: taste & odour and benzene
Source: Royal Society of Chemistry journal article supplement (doi:10.1039/d2ew00046f), 2022-01-01
Supplement: d2ew00046f1.pdf [file d2ew00046f1.pdf]

## Supplementary Information

### 1. Method MIB/Geosmin and benzene

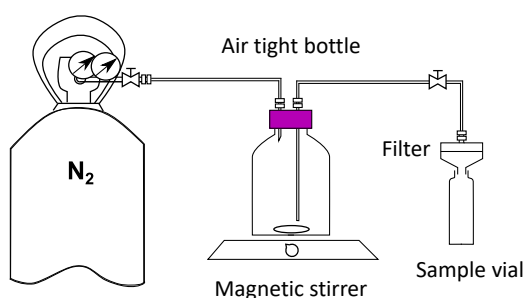

Figure SI 1 : Air-tight setup for benzene adsorption experiments and sampling

Table SI 1 : Analytical methods parameters and validation data

| Pollutant       | Desorption parameters (TDU-CIS)                                                   | GC gradient                                                                 | Sample extraction                                                          | Injection mode | Quantification ions ( <i>m/z</i> )                   | Internal standards      | LOD (ng/L)                                |
|-----------------|-----------------------------------------------------------------------------------|-----------------------------------------------------------------------------|----------------------------------------------------------------------------|----------------|------------------------------------------------------|-------------------------|-------------------------------------------|
| Geosmin and MIB | TDU: 30°C (1 min) rate 720°C/min to 280°C (3 min); CIS: 12°C/min to 280°C (5 min) | 50°C (2 min); 10°C/min to 200°C; 25°C/min to 280°C; 280°C (2 min)           | 10 g NaCl; stir bar placed into the sample (50 mL) at 1200 rpm during 1h   | Venting mode   | <i>m/z</i> 95 for geosmin and <i>m/z</i> 112 for MIB | cis-decahydro-1-naphtol | 0.8 ng/L for MIB and 0.4 ng/L for geosmin |
| Benzene         | TDU: 20°C (1 min) rate 720°C/min to 280°C (2 min); CIS: 12°C/min to 280°C (5 min) | 35°C (5 min); 5°C/min to 70°C, 30°C/min to 220°C, 80°C/min to 280°C (2 min) | Stir bar placed into the gas phase. Sample (50 mL) was stirred at 1750 rpm | Splitless mode | <i>m/z</i> 78                                        | d <sup>6</sup> -benzene | 21 ng/L                                   |

Table SI 2 : Parameters obtained during the method development for MIB/Geosmin and benzene analysis

| Compounds | LOD (ng/L) | R2 | Repeatability at 50 ng/L (%) | Reproducibility (%) | Accuracy (%) |
|-----------|------------|----|------------------------------|---------------------|--------------|
|-----------|------------|----|------------------------------|---------------------|--------------|

|         |     |       |    |    |    |
|---------|-----|-------|----|----|----|
| Geosmin | 0.8 | 0.992 | 5  | 8  | 13 |
| MIB     | 0.4 | 0.999 | 3  | 7  | 13 |
| Benzene | 21  | 0.998 | 15 | 18 | 15 |

Stir bar sorptive extraction coupled to GC-MS (SBSE-GC-MS) has been widely used to extract off flavour compounds from water samples.<sup>1-3</sup> Benanou et al. have developed a method with this technique that showed good linearity over the concentration range 5-40 ng/L for MIB/geosmin.<sup>4</sup> The development of this method was inspired by this publication. Method parameters and validation control measurements for all target compounds can be found in Table SI 1 and Table SI 2.

For method validation: A five-point calibration curve was obtained by spiking surface water samples at 1, 5, 10, 50, 100 and 250 ng·L<sup>-1</sup> of MIB/geosmin. The method limit of detection (LOD) and method limit of quantification (LOQ) were determined as 3.3 and 10 times, respectively, the standard deviation of the y intercept divided by the slope of the calibration curve in the matrix sample. A deuterated benzene internal standard (IS) was used to correct the signal variation of benzene and a homologous compound was used to correct the MIB/geosmin signal. Thus, concentrations of geosmin, MIB and benzene were calculated using the ratio of the target compounds area to that of the labelled IS. In each set of samples, the IS were added to the samples before the extraction step. Repeatability (intra-day precision) was calculated by analysing the same spiked and extracted samples at two different concentrations (50 and 250 ng·L<sup>-1</sup>) on a single workday (n = 5) and was expressed as a relative standard deviation (RSD - %). Reproducibility (inter-day precision) was also evaluated by analysing spiked and extracted samples at two different concentrations (50 and 250 ng·L<sup>-1</sup>) for two days (n = 5 each days) and prepared daily. Accuracy was determined by the relative error (%) and precision values were calculated as the RSD (%).

## 2. Correlations between iodine number and carbon characteristics

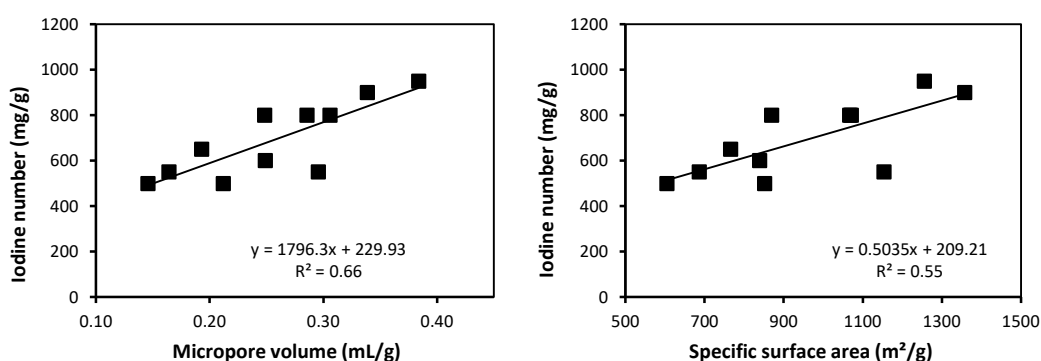

Figure SI 2: Iodine number as a function of micropore volume and specific surface area

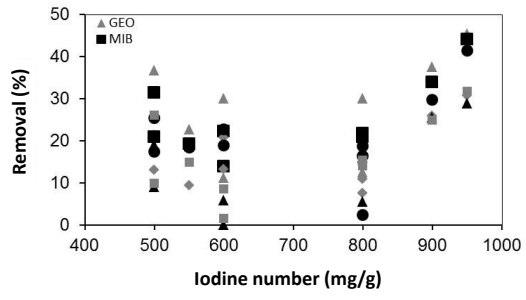

Figure SI 3: Removal of MIB and geosmin as a function of iodine number

### 3. Performance data of the tested PACs in different water types

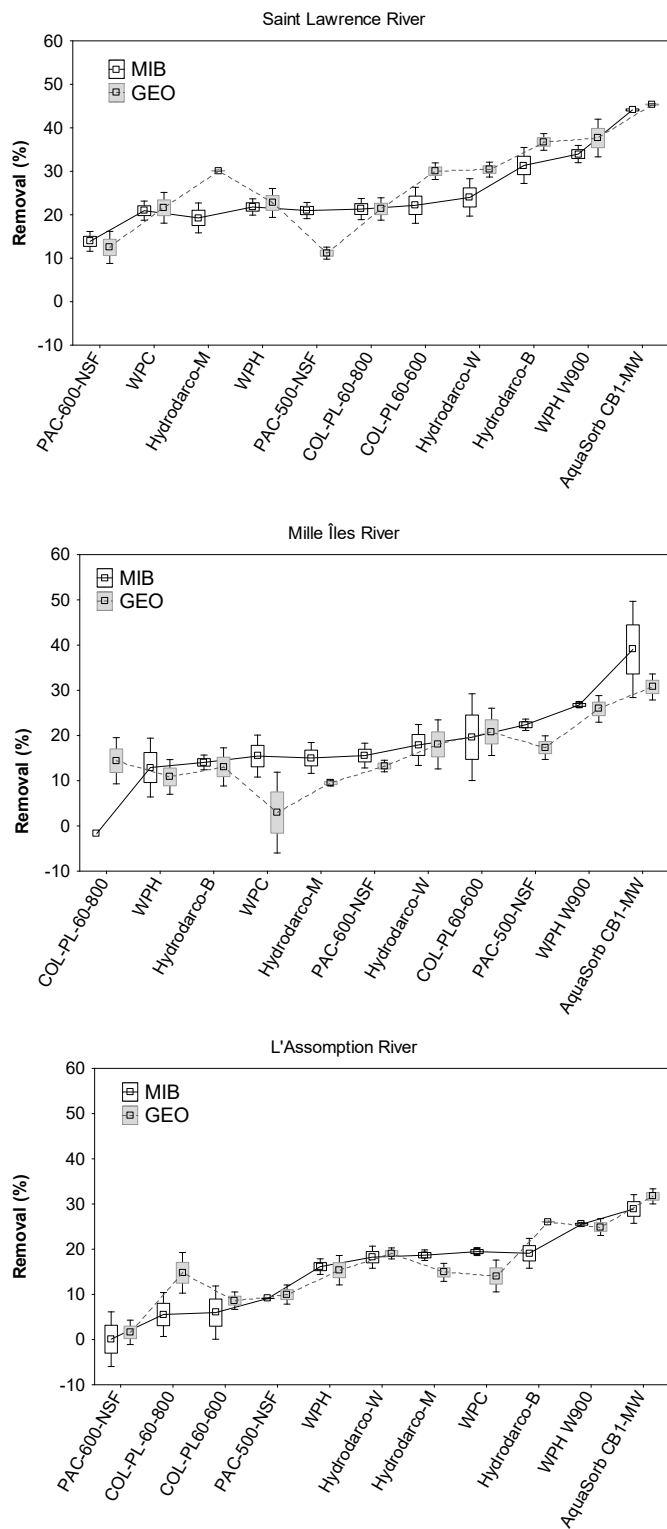

Figure SI 4: Removal performance in all three water matrices

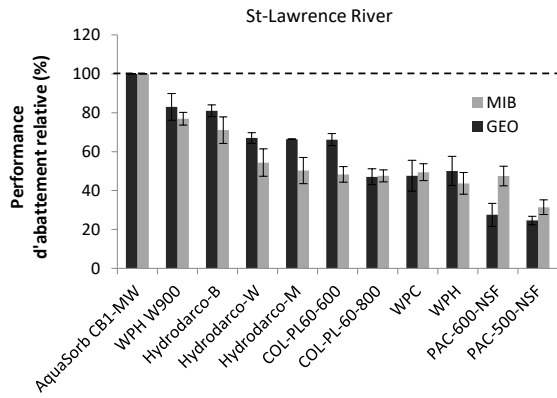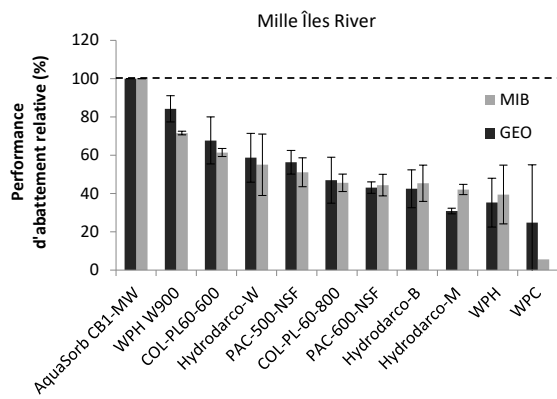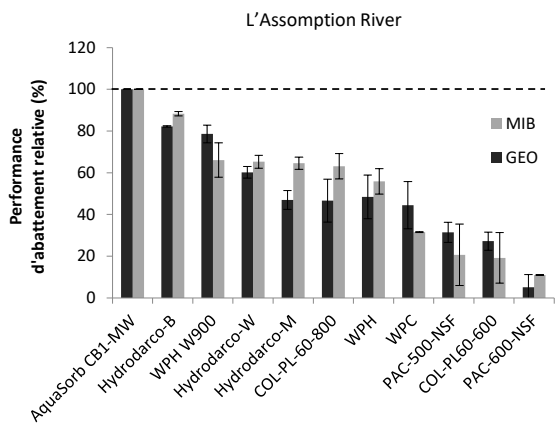

Figure SI 5: Relative removal performance of MIB and geosmin in water from the St-Lawrence and Mille Îles River

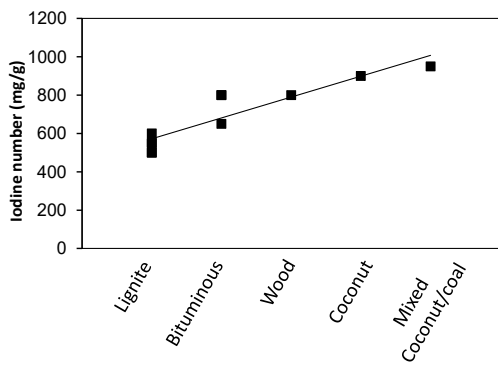

Figure SI 6: Iodine numbers of PAC with different base material.

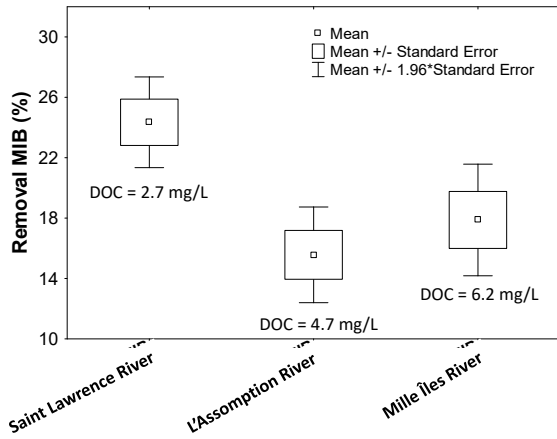

Figure SI 7: Removal of MIB in three tested water matrices

#### 4. Carbon characteristics

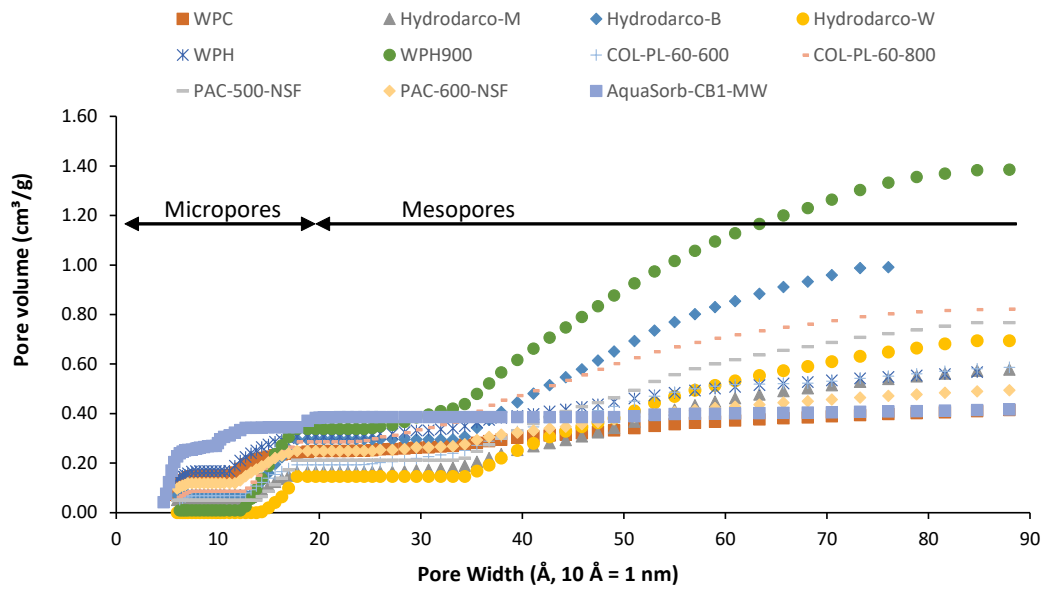

Figure SI 8: Pore size distributions of all tested carbons

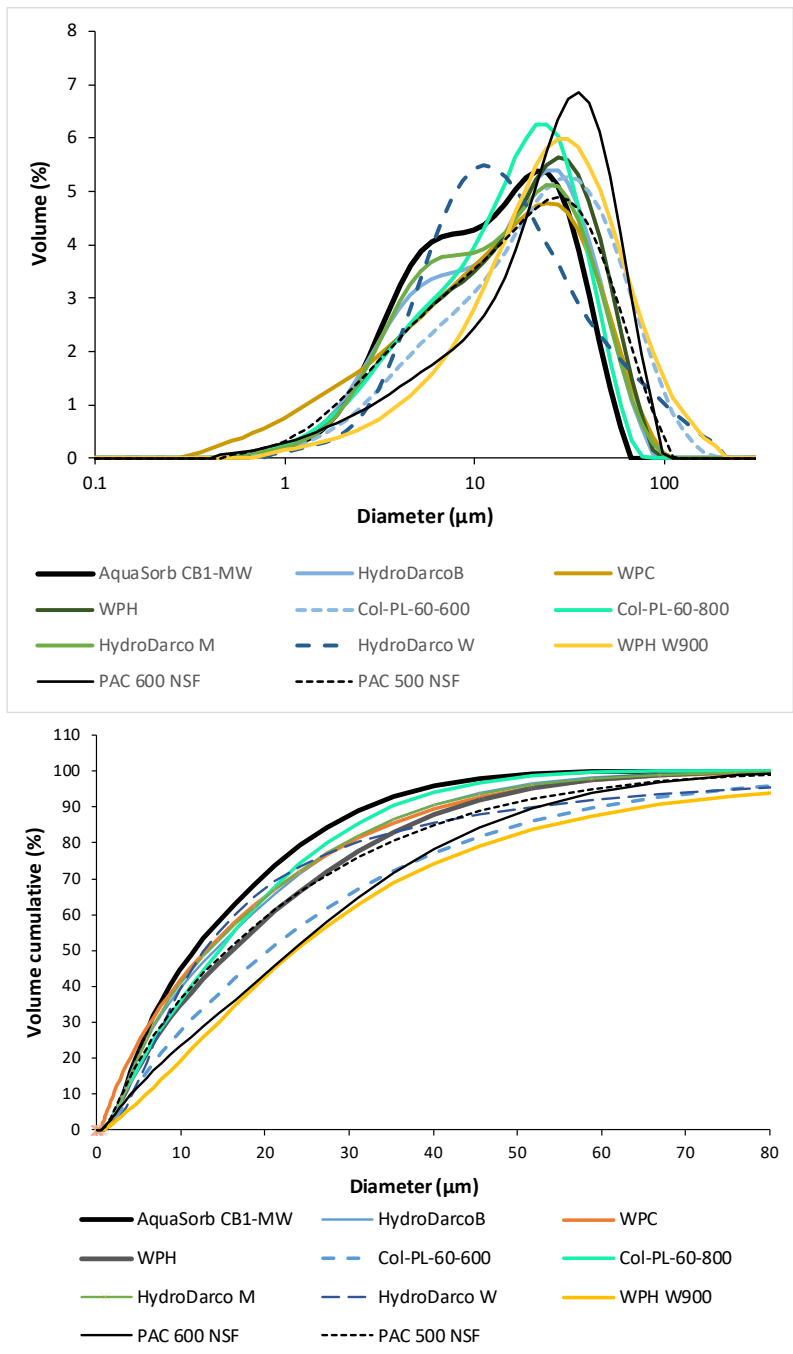

Figure SI 9: Particle size distributions of PACs as (a) frequency distribution and (b) cumulative curve

Table SI 3: General linear models tested

| Model | Predictors                                                                                                                             | Predictor type                                                       | Levels                | P-values                                                                       | R <sup>2</sup> | Adjusted R <sup>2</sup> |
|-------|----------------------------------------------------------------------------------------------------------------------------------------|----------------------------------------------------------------------|-----------------------|--------------------------------------------------------------------------------|----------------|-------------------------|
| 1     | Micropore Vol<br>Uniformity Coeff<br>D50<br>Matrix<br>Pollutant                                                                        | Continuous<br>Continuous<br>Continuous<br>Categorical<br>Categorical | -<br>-<br>-<br>3<br>2 | 0.003<br>0.003<br>< 0.001<br>< 0.001<br><b>0.860</b>                           | <b>0.425</b>   | <b>0.367</b>            |
| 2     | Micropore Vol<br>Uniformity Coeff<br>Matrix<br>D50                                                                                     | Continuous<br>Continuous<br>Categorical<br>Continuous                | -<br>-<br>3<br>-      | 0.003<br>0.002<br>< 0.001<br><b>0.084</b>                                      | <b>0.425</b>   | <b>0.377</b>            |
| 3     | Micropore Vol<br>Uniformity Coeff<br>Matrix                                                                                            | Continuous<br>Continuous<br>Categorical                              | -<br>-<br>3           | 0.005<br>< 0.001<br>< 0.001                                                    | <b>0.395</b>   | <b>0.355</b>            |
| 4     | Micropore Vol<br>Uniformity Coeff<br>Total LMW NOM                                                                                     | Continuous<br>Continuous<br>Continuous                               | -<br>-<br>-           | 0.006<br>0.003<br>< 0.001                                                      | <b>0.355</b>   | <b>0.324</b>            |
| 5     | Micropore Vol<br>Uniformity Coeff<br>DOC                                                                                               | Continuous<br>Continuous<br>Continuous                               | -<br>-<br>-           | 0.008<br>0.004<br>0.004                                                        | <b>0.300</b>   | <b>0.267</b>            |
| 6     | Micropore Vol<br>Uniformity Coeff<br>UVA254                                                                                            | Continuous<br>Continuous<br>Continuous                               | -<br>-<br>-           | 0.008<br>0.004<br>0.002                                                        | <b>0.310</b>   | <b>0.277</b>            |
| 7     | Micropore Vol<br>Uniformity Coeff<br>Matrix<br>Micropore Vol x Uniformity Coeff<br>Micropore Vol x Matrix<br>Uniformity Coeff x Matrix | Continuous<br>Continuous<br>Categorical                              | -<br>-<br>3           | 0.019<br><b>0.138</b><br><b>0.511</b><br>0.045<br><b>0.746</b><br><b>0.770</b> | <b>0.448</b>   | <b>0.359</b>            |
| 8     | Micropore Vol<br>Uniformity Coeff<br>Matrix<br>Micropore Vol x Uniformity Coeff                                                        | Continuous<br>Continuous<br>Continuous                               | -<br>-<br>-           | 0.017<br><b>0.129</b><br>< 0.001<br>0.040                                      | <b>0.437</b>   | <b>0.390</b>            |

## References

1. N. Ochiai, K. Sasamoto, M. Takino, S. Yamashita, S. Daishima, A. Heiden and A. Hoffman, *Determination of trace amounts of off-flavor compounds in drinking water by stir bar sorptive extraction and thermal desorption GC-MS*, *Analyst*, 2001, **126**, 1652-1657.
2. S. Nakamura, N. Nakamura and S. Ito, *Determination of 2-methylisoborneol and geosmin in water by gas chromatography-mass spectrometry using stir bar sorptive extraction*, *Journal of Separation Science*, 2001, **24**, 674-677.
3. J. D. Carmi, I. Olivares, P. Grossi and F. M. Lancas, *Refrigerated Sorptive Extraction: Determination of BTEX in Water Samples*, *Journal of Chromatographic Science*, 2009, **47**, 812-816.
4. D. Benanou, F. Acobas and M.-R. de Roubin, *Optimization of stir bar sorptive extraction applied to the determination of odorous compounds in drinking water*, *Water Science and Technology*, 2004, **49**, 161-170.
